# Supplementary material for: Structure and dynamics of the chromatin remodeler ALC1 bound to a PARylated nucleosome
Source: eLife. 2021 Sep 6;10:e71420. doi: 10.7554/eLife.71420 (PMC8463071; doi:10.7554/eLife.71420)
Supplement: Figure 1—source data 1. [file elife-71420-fig1-data1.xlsx]

## Sheet: B
time [s]	-HPF1_replicate_01	+HPF1_replicate_01	-HPF1_replicate_02	+HPF1_replicate_02	-HPF1_replicate_03	+HPF1_replicate_03
0	0.50638	0.50153	0.50449	0.49753	0.50308	0.49774
4	0.50276	0.50139	0.50214	0.49705	0.50325	0.49968
8	0.5059	0.50127	0.5032	0.49665	0.50453	0.49929
12	0.50495	0.50004	0.50275	0.49693	0.50422	0.4984
16	0.50411	0.50103	0.5026	0.49606	0.50599	0.50018
20	0.50525	0.50074	0.50255	0.49577	0.50359	0.49877
24	0.50298	0.50229	0.50293	0.49689	0.50375	0.50046
28	0.50531	0.50077	0.50297	0.49584	0.5045	0.49852
32	0.50507	0.49988	0.50332	0.49458	0.50489	0.49904
36	0.50437	0.50273	0.50206	0.49731	0.5032	0.49813
40	0.50487	0.5014	0.50409	0.49717	0.50356	0.49869
44	0.50436	0.50222	0.50361	0.49639	0.50317	0.4982
48	0.50655	0.50337	0.50464	0.49656	0.50438	0.50062
52	0.5036	0.50235	0.50101	0.49815	0.50437	0.49952
56	0.50606	0.50215	0.50322	0.49637	0.50358	0.50045
60	0.50411	0.5003	0.50496	0.49767	0.50198	0.49725
64	0.50662	0.50132	0.50178	0.49773	0.50263	0.49881
68	0.50531	0.50177	0.50338	0.49625	0.50297	0.49961
72	0.50531	0.50194	0.50258	0.49573	0.50325	0.49915
76	0.50344	0.50143	0.50345	0.49675	0.50406	0.50004
80	0.5054	0.50029	0.50473	0.49719	0.50351	0.50047
84	0.50536	0.50236	0.50194	0.49686	0.50579	0.49834
88	0.50445	0.50127	0.5026	0.49794	0.50467	0.49927
92	0.50456	0.50133	0.50235	0.49773	0.5068	0.50049
96	0.50478	0.49999	0.50337	0.49491	0.50343	0.49897
100	0.50517	0.50018	0.50328	0.49483	0.50453	0.49899
104	0.50516	0.50294	0.50331	0.49778	0.50464	0.49972
108	0.50531	0.49991	0.5036	0.49741	0.50378	0.49883
112	0.5033	0.50082	0.50398	0.49683	0.505	0.49869
116	0.50481	0.50207	0.50359	0.49692	0.5011	0.50004
171	0.47164	0.42001	0.46892	0.40512	0.48274	0.4345
175	0.46895	0.4145	0.46278	0.39634	0.47908	0.42547
179	0.46722	0.40547	0.45948	0.3897	0.47832	0.4195
183	0.46495	0.39907	0.45697	0.38349	0.47705	0.41223
187	0.46233	0.3916	0.45437	0.37701	0.47302	0.4042
191	0.46007	0.38746	0.45063	0.37163	0.46778	0.40068
195	0.45593	0.38263	0.44941	0.36472	0.46717	0.39136
199	0.45148	0.37632	0.44684	0.36142	0.46711	0.38518
203	0.45304	0.36878	0.44366	0.3564	0.46358	0.37935
207	0.4475	0.36265	0.44194	0.35297	0.46031	0.37471
211	0.44729	0.36051	0.44238	0.34955	0.46058	0.36936
215	0.44548	0.3536	0.43984	0.34515	0.45786	0.36578
219	0.44527	0.35077	0.43805	0.34308	0.45473	0.36357
223	0.44379	0.34723	0.43686	0.33817	0.4536	0.35884
227	0.44144	0.34216	0.436	0.33696	0.45134	0.35461
231	0.43776	0.34157	0.43254	0.33304	0.44982	0.34999
235	0.4372	0.33622	0.43056	0.32855	0.44572	0.34866
239	0.43413	0.33498	0.43058	0.3261	0.44481	0.34452
243	0.43383	0.33025	0.42773	0.3217	0.44659	0.34001
247	0.4351	0.32828	0.42791	0.31921	0.44379	0.33826
251	0.43197	0.32627	0.42428	0.31795	0.44327	0.33437
255	0.43073	0.32451	0.42386	0.31623	0.44065	0.33198
259	0.43043	0.32185	0.42286	0.31265	0.43938	0.33031
263	0.42725	0.31965	0.42267	0.31104	0.43804	0.32649
267	0.42658	0.318	0.42088	0.31062	0.43701	0.32459
271	0.42519	0.31637	0.42058	0.30791	0.43546	0.32414
275	0.42368	0.31529	0.41755	0.30585	0.43632	0.32024
279	0.42339	0.31303	0.41734	0.30404	0.43246	0.31921
283	0.42128	0.31309	0.41684	0.3022	0.43218	0.31943
287	0.42211	0.3115	0.41673	0.30131	0.43074	0.31854
291	0.42048	0.30761	0.41431	0.29925	0.42896	0.31649
295	0.41867	0.308	0.41208	0.29705	0.42712	0.31364
299	0.41917	0.30712	0.41008	0.29721	0.42802	0.31218
303	0.41671	0.30616	0.41102	0.29523	0.42442	0.31111
307	0.41686	0.30357	0.40993	0.29262	0.42526	0.31052
311	0.41815	0.30219	0.4102	0.29288	0.42425	0.30644
315	0.41424	0.3004	0.40737	0.29151	0.42391	0.30657
319	0.41453	0.30051	0.40673	0.28727	0.42038	0.30339
323	0.41406	0.29751	0.40721	0.2872	0.42066	0.30079
327	0.4135	0.29599	0.40649	0.2853	0.41777	0.29894
331	0.41165	0.29541	0.40477	0.28522	0.41949	0.29829
335	0.41174	0.2949	0.40473	0.28385	0.41578	0.29795
339	0.41206	0.29166	0.40377	0.28292	0.41661	0.29505
343	0.40993	0.29211	0.40246	0.28024	0.41657	0.29314
347	0.4096	0.28993	0.40146	0.27998	0.41431	0.29301
351	0.41009	0.28893	0.40399	0.27951	0.41191	0.29201
355	0.41002	0.28787	0.39951	0.27771	0.4129	0.28797
359	0.40619	0.28655	0.3983	0.27893	0.41259	0.28926
363	0.40521	0.2846	0.39887	0.27588	0.4118	0.28618
367	0.40713	0.28493	0.39687	0.27331	0.41259	0.28583
371	0.40486	0.2852	0.39864	0.27504	0.41042	0.28484
375	0.40675	0.28284	0.39778	0.27363	0.41112	0.28294
379	0.40594	0.28181	0.39461	0.27273	0.4106	0.28216
383	0.40355	0.28238	0.39696	0.2725	0.40896	0.28185
387	0.40242	0.27985	0.39707	0.27308	0.4089	0.27893
391	0.40333	0.28052	0.39301	0.26995	0.40893	0.27837
395	0.40203	0.27794	0.39391	0.27119	0.40748	0.27799
399	0.40329	0.27866	0.39357	0.26811	0.40744	0.27714
403	0.40076	0.27747	0.3913	0.26708	0.40519	0.27734
407	0.39837	0.27725	0.39318	0.26634	0.40511	0.27497
411	0.3983	0.27512	0.39144	0.26643	0.40379	0.2753
415	0.399	0.27337	0.39094	0.26486	0.40338	0.27382
419	0.398	0.27495	0.38979	0.2664	0.40401	0.27277
423	0.39836	0.27255	0.39078	0.26414	0.40368	0.2727
427	0.3984	0.27227	0.38931	0.26381	0.40416	0.2715
431	0.39722	0.27199	0.38925	0.26348	0.40092	0.27089
435	0.39593	0.27067	0.38977	0.26337	0.40106	0.26988
439	0.39468	0.26956	0.38722	0.26326	0.39896	0.26968
443	0.39631	0.26949	0.38855	0.26164	0.40086	0.26957
447	0.3963	0.2676	0.38682	0.26193	0.39982	0.26779
451	0.39564	0.26817	0.38649	0.25941	0.39722	0.26805
455	0.3917	0.2675	0.38688	0.2606	0.39927	0.26682
459	0.39165	0.2671	0.38743	0.25927	0.39826	0.26614
463	0.39296	0.26675	0.38437	0.25913	0.39732	0.26616
467	0.3934	0.26506	0.38229	0.25872	0.39644	0.26527
471	0.39189	0.26501	0.38417	0.25706	0.39558	0.26272
475	0.39128	0.26443	0.3854	0.25802	0.39759	0.26403
479	0.3926	0.2645	0.38317	0.25629	0.39392	0.26284
483	0.39061	0.26317	0.38158	0.25707	0.39406	0.26348
487	0.39223	0.26252	0.38273	0.25688	0.39639	0.2619
491	0.39104	0.26335	0.38209	0.25442	0.39331	0.26245
495	0.38843	0.26184	0.38084	0.25486	0.39253	0.26037
499	0.38812	0.26311	0.38301	0.2545	0.3924	0.26124
503	0.39095	0.26141	0.38098	0.25255	0.39147	0.2598
507	0.38943	0.2612	0.3808	0.25331	0.39067	0.25919
511	0.38937	0.2597	0.37978	0.25262	0.38971	0.25891
515	0.38861	0.25928	0.37778	0.25126	0.39169	0.25861
519	0.3895	0.25974	0.37953	0.2522	0.39149	0.25731
523	0.38878	0.25856	0.37882	0.25237	0.38967	0.25647
527	0.38845	0.25774	0.37894	0.25047	0.3881	0.25665
531	0.38747	0.25781	0.37745	0.25085	0.38949	0.2553
535	0.38785	0.25633	0.37786	0.25169	0.38837	0.25476
539	0.38671	0.2566	0.37848	0.24909	0.38719	0.25653
543	0.38552	0.25612	0.37789	0.25015	0.38704	0.25373
547	0.38583	0.25567	0.37739	0.25117	0.38558	0.25446
551	0.38377	0.2568	0.37497	0.24714	0.39087	0.25486
555	0.38532	0.25454	0.37481	0.24753	0.38553	0.25413
559	0.3835	0.2554	0.37613	0.24874	0.38681	0.25216
563	0.38459	0.25424	0.37577	0.2481	0.38453	0.25282
567	0.38365	0.25477	0.37613	0.24698	0.38513	0.2516
571	0.38411	0.2542	0.37444	0.24758	0.3849	0.25144
575	0.38371	0.25366	0.37367	0.24529	0.38301	0.25187
579	0.38248	0.25254	0.37453	0.24578	0.38493	0.2514
583	0.38364	0.25255	0.37445	0.243	0.38326	0.24997
587	0.38089	0.25114	0.3715	0.246	0.38579	0.25026
591	0.38146	0.25231	0.37164	0.24263	0.38313	0.24962
595	0.38011	0.25245	0.37328	0.2428	0.38108	0.2489
599	0.38369	0.25057	0.37203	0.24714	0.3827	0.24855
603	0.38215	0.25163	0.37202	0.24321	0.38279	0.24744
607	0.3812	0.2505	0.37131	0.24353	0.38097	0.24768
611	0.3804	0.25032	0.37172	0.24262	0.37956	0.24655
615	0.38045	0.2495	0.37051	0.24333	0.38117	0.2461
619	0.38017	0.24889	0.37093	0.23856	0.3807	0.24739
623	0.37888	0.24897	0.36992	0.24672	0.38145	0.24824
627	0.38167	0.24741	0.36894	0.24322	0.38035	0.24648
631	0.38064	0.24838	0.36921	0.23883	0.37779	0.24644
635	0.38026	0.247	0.36945	0.24125	0.37957	0.24588
639	0.38005	0.24724	0.36887	0.24076	0.37853	0.24526
643	0.3784	0.24705	0.36708	0.23926	0.379	0.24533
647	0.37841	0.246	0.3683	0.24008	0.3768	0.24444
651	0.37884	0.24629	0.36688	0.2409	0.3771	0.24435
655	0.37688	0.24736	0.36913	0.24008	0.37629	0.24353
659	0.3764	0.2467	0.36814	0.23892	0.37805	0.24426
663	0.37646	0.24504	0.36653	0.2403	0.37587	0.24326
667	0.37474	0.24519	0.36804	0.23933	0.37718	0.24218
671	0.378	0.24465	0.3668	0.23918	0.37747	0.24383
675	0.3756	0.24526	0.36629	0.23739	0.37538	0.24338
679	0.37599	0.24392	0.36748	0.23844	0.37479	0.24222
683	0.37719	0.24425	0.36615	0.23899	0.37593	0.24267
687	0.37727	0.24413	0.36497	0.23787	0.3734	0.24119
691	0.37525	0.24435	0.36429	0.23789	0.37445	0.24215
695	0.37676	0.24367	0.36538	0.23849	0.37399	0.241
699	0.37317	0.24291	0.36335	0.23873	0.3735	0.24107
703	0.37352	0.24264	0.36513	0.23738	0.37174	0.24019
707	0.37558	0.24281	0.36401	0.2373	0.37172	0.2393
711	0.37253	0.24249	0.36438	0.23705	0.372	0.2398
715	0.37368	0.24235	0.3625	0.2368	0.37223	0.23982
719	0.37238	0.24222	0.36414	0.23658	0.37245	0.23981
723	0.37317	0.24197	0.36184	0.23734	0.37121	0.23952
727	0.37314	0.24323	0.36256	0.23563	0.37248	0.23816
731	0.3714	0.24157	0.3614	0.23544	0.37041	0.23886
735	0.37434	0.24169	0.36166	0.23478	0.36985	0.2384
739	0.37286	0.24048	0.36266	0.23427	0.3705	0.23978
743	0.37408	0.24065	0.36146	0.23516	0.36885	0.23844
747	0.37296	0.23966	0.36049	0.23402	0.37002	0.23967
751	0.37219	0.24146	0.36008	0.23393	0.36964	0.23778
755	0.37226	0.23963	0.35998	0.23357	0.36896	0.23676
759	0.37115	0.23944	0.36058	0.23199	0.36727	0.23815
763	0.37119	0.23796	0.36011	0.23331	0.36818	0.23684
767	0.37083	0.2396	0.35972	0.23337	0.36987	0.23806
771	0.37084	0.23953	0.35986	0.23329	0.36767	0.23633
775	0.37119	0.23831	0.35884	0.23379	0.36703	0.23601
779	0.37086	0.23757	0.35941	0.23345	0.3676	0.2356
783	0.36977	0.23874	0.35826	0.23181	0.36735	0.23476
787	0.36967	0.23809	0.35937	0.23204	0.3679	0.2354
791	0.36849	0.23897	0.35649	0.23163	0.36525	0.23357
795	0.36826	0.23707	0.35719	0.23268	0.36761	0.23462
799	0.36719	0.23624	0.35695	0.23206	0.36794	0.23428
803	0.36853	0.23726	0.35666	0.23079	0.36562	0.23418
807	0.36851	0.23649	0.35697	0.23273	0.36502	0.23445
811	0.36844	0.23785	0.35663	0.23119	0.365	0.23384
815	0.3673	0.23801	0.35715	0.23089	0.36769	0.2341
819	0.36754	0.2367	0.35536	0.23026	0.36692	0.23251
823	0.36683	0.23569	0.3558	0.23207	0.36397	0.2326
827	0.36674	0.23644	0.35543	0.23026	0.36459	0.23326
831	0.36646	0.23515	0.354	0.2298	0.36495	0.23246
835	0.3665	0.23648	0.35605	0.22966	0.36541	0.2322
839	0.36653	0.23624	0.35529	0.22911	0.36454	0.23306
843	0.36703	0.2352	0.35469	0.23004	0.36349	0.23177
847	0.36507	0.23476	0.35447	0.23001	0.36452	0.23249
851	0.3662	0.23442	0.35491	0.23053	0.36217	0.23175
855	0.36624	0.23529	0.35369	0.22841	0.36393	0.23138
859	0.36471	0.23601	0.35425	0.22927	0.3631	0.23218
863	0.36686	0.23382	0.35384	0.22869	0.36138	0.23133
867	0.36425	0.2349	0.35289	0.22821	0.36155	0.23108
871	0.36297	0.23484	0.35214	0.22785	0.36151	0.22971
875	0.36582	0.23312	0.35289	0.22879	0.35954	0.22999
879	0.36294	0.23389	0.35279	0.22784	0.36017	0.23044
883	0.36467	0.23339	0.35271	0.22738	0.3601	0.22928
887	0.36314	0.23361	0.35239	0.22713	0.35993	0.23097
891	0.36377	0.23286	0.35103	0.22844	0.36036	0.23008
895	0.36226	0.23255	0.35174	0.2265	0.36008	0.23133
899	0.36148	0.23259	0.35138	0.22731	0.35934	0.22956
903	0.3612	0.2326	0.35073	0.22793	0.35963	0.22977
907	0.36264	0.23142	0.35108	0.22743	0.35863	0.23027
911	0.36224	0.23241	0.35155	0.22556	0.35851	0.22971
915	0.36114	0.23131	0.35083	0.22712	0.36062	0.22851
919	0.36102	0.23178	0.34928	0.22748	0.35939	0.22937
923	0.36054	0.23198	0.34985	0.2251	0.35657	0.22938
927	0.35994	0.23112	0.3513	0.2273	0.3581	0.22926
931	0.36141	0.23151	0.34967	0.22549	0.35879	0.2292
935	0.35986	0.23173	0.35064	0.22685	0.35835	0.22918
939	0.36075	0.232	0.35018	0.22685	0.35759	0.22876
943	0.3608	0.23143	0.34878	0.22529	0.3552	0.22726
947	0.36174	0.23101	0.34947	0.22563	0.3572	0.22795
