# Supplementary material for: Structure and dynamics of the chromatin remodeler ALC1 bound to a PARylated nucleosome
Source: eLife. 2021 Sep 6;10:e71420. doi: 10.7554/eLife.71420 (PMC8463071; doi:10.7554/eLife.71420)
Supplement: Figure 5—source data 1. [file elife-71420-fig5-data1.xlsx]

## Sheet: B
ALC1 wt [nM]	+HPF1_replicate_01	+HPF1_replicate_02	+HPF1_replicate_03	-HPF1_replicate_01	-HPF1_replicate_02	-HPF1_replicate_03
2000	0.000834182	0.00110219	0.00113073	0.00115907	0.000864477	0.000999176
1000	0.00104819	0.00106797	0.00100128	0.000955559	0.00122354	0.000772133
500	0.000726	0.000930055	0.000924301	0.00112501	0.00111529	0.00100223
250	0.000800659	0.000827579	0.000886608	0.000775935	0.000915818	0.000780822
125	0.000946879	0.00095264	0.000941451	0.000727264	0.000921949	0.00085035
62.5	0.00121874	0.00138957	0.001152	0.000607911	0.000590316	0.000733689
31.3	0.00151422	0.00146404	0.00133481	0.000569904	0.000597266	0.0006025
15.6	0.00128037	0.00123644	0.0012342	0.000419986	0.000406171	0.00050331
7.8	0.000656786	0.000662297	0.000584336	0.000225982	0.000222348	0.000231556
3.9	0.000381312	0.000396723	0.000322841	0.000117402	0.000115304	0.0001075
1.95	0.000132451	0.00014342	0.000108199
0.98	8.05495e-06	0.00018264	2.58791e-05

## Sheet: C
ALC1 R611A/S612A [nM]	+HPF1_replicate_01	+HPF1_replicate_02	+HPF1_replicate_03
2000	0.000540614	0.000674931	0.000816591
1000	0.000873614	0.000863687	0.000856568
500	0.000908591	0.000827409	0.000843668
250	0.000950409	0.000922348	0.00103755
125	0.00116864	0.00104331	0.000991205
62.5	0.00112566	0.00106997	0.00110473
31.25	0.000558049	0.00100946	0.000979
15.625	0.00038614	0.000484396	0.000412394

## Sheet: D
	APM-nuc	APM-nuc	APM-nuc
ALC1 wt [nM]	+HPF1_replicate_01	+HPF1_replicate_02	+HPF1_replicate_03
2000	0.000226984	0.000314407	0.000406011
1000	0.000459571	0.000301165	0.000366242
500	0.000521637	0.000662209	0.000466085
250	0.000755659	0.000775489	0.000716956
125	0.000573379	0.00063917	0.000558868
62.5	0.000384071	0.000361544	0.000488797
31.25	0.000212341	0.000272352	0.000395099
15.625	0.000124308	0.000104533	8.30907e-05

## Sheet: E
	gH4-nuc	gH4-nuc	gH4-nuc
ALC1 wt [nM]	+HPF1_replicate_01	+HPF1_replicate_02	+HPF1_replicate_03
2000	0.000196938	0.000243884	0.000217459
1000	0.000351937	0.000368283	0.000538824
500	0.000601071	0.000675948	0.000684742
250	0.000880071	0.000563033	0.00081422
125	0.00080256	0.000994527	0.000942549
62.5	0.000797764	0.000813703	0.000904599
31.25	0.000398148	0.00033761	0.000412434
15.625	0.000252429	0.000193077	0.000190962

## Sheet: F
	wt-nuc	wt-nuc	wt-nuc	gH4-nuc
	ALC1-wt	ALC1-wt	ALC1-R611A/S612A	ALC1-wt
	-HPF1 [ATP per second per ALC1]	+HPF1 [ATP per second per ALC1]	+HPF1 [ATP per second per ALC1]	+HPF1 [ATP per second per ALC1]
replicate_01	3.61538	3.08675	1.14961	1.49855
replicate_02	3.85654	3.9459	1.45837	0.718026
replicate_03	3.05865	3.52549	1.5266	0.69599
